# Supplementary material
Source: PubMed Central journal article supplement (PMC3660999)
Supplement: 023c2a5043dcfe79c2f8268e1b53b46f_genetics.112.139519-3.pdf [file 023c2a5043dcfe79c2f8268e1b53b46f_genetics.112.139519-3.pdf]

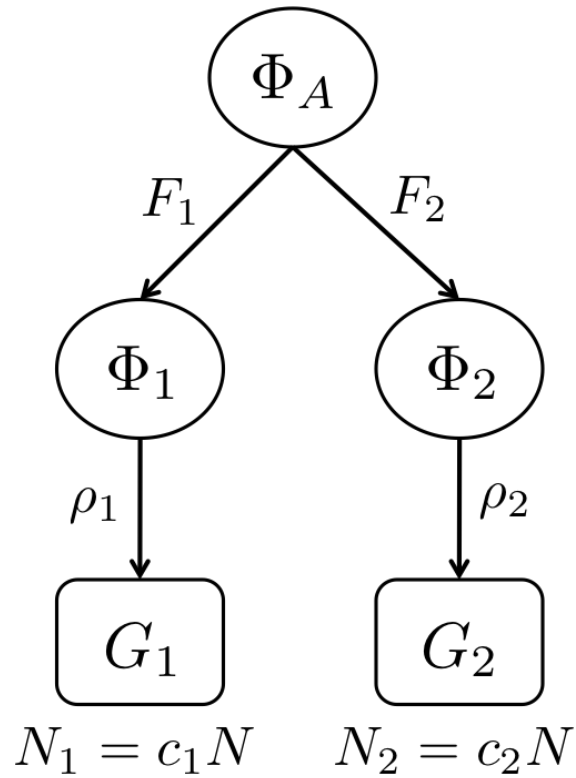

Figure S7: Illustration of a structured population with two subpopulations, under the  $F$  model.  $\Phi_A$  denotes the allele frequencies of a common ancestral population of the two subpopulations.  $\Phi_1$  and  $\Phi_2$  are allele frequencies of the two subpopulations. The  $F$  parameter and the inbreeding coefficient for subpopulation  $j$  are  $F_j$  and  $\rho_j$ , respectively ( $j = 1, 2$ ). In the pooled genotype data of  $N$  individuals,  $c_1$  is the proportion sampled from subpopulation 1, producing genotype data  $G_1$ ,  $c_2 = 1 - c_1$  is the proportion sampled from subpopulation 2, producing genotype data  $G_2$ .
