# Supplementary material
Source: PubMed Central journal article supplement (PMC3660999)
Supplement: 843114e48d44fc580da49283c4c4e834_genetics.112.139519-8.pdf [file 843114e48d44fc580da49283c4c4e834_genetics.112.139519-8.pdf]

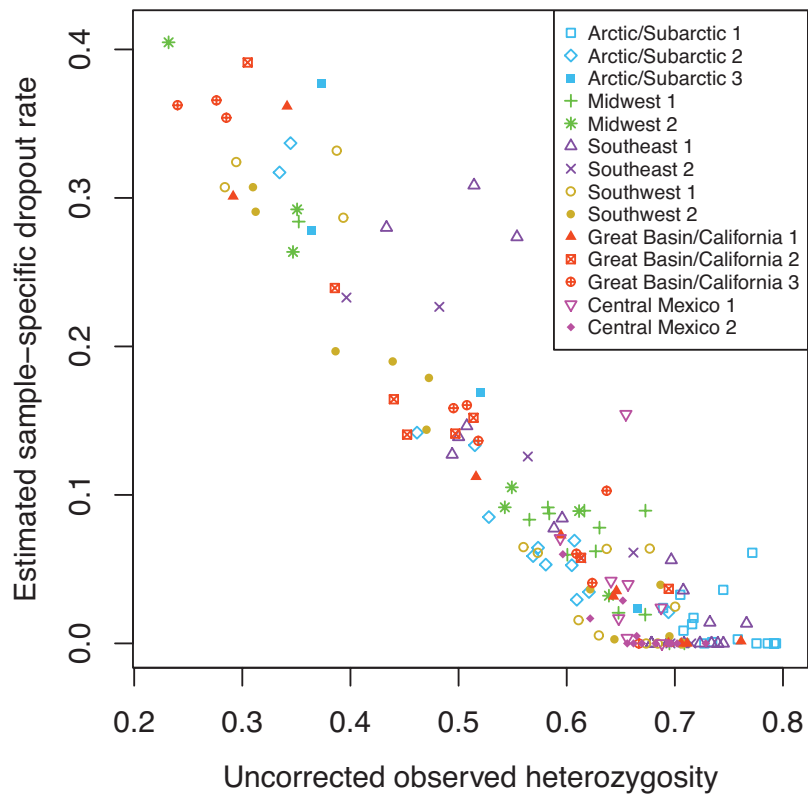

Figure S1: The estimated sample-specific dropout rate versus the observed heterozygosity before correcting for allelic dropout in the Native American data. For each individual, loci with both copies missing are excluded from the calculation of observed heterozygosity.
