# Supplementary material
Source: PubMed Central journal article supplement (PMC3660999)
Supplement: b75b8e09bfb42304bf3acaec2ff7bfb7_genetics.112.139519-5.pdf [file b75b8e09bfb42304bf3acaec2ff7bfb7_genetics.112.139519-5.pdf]

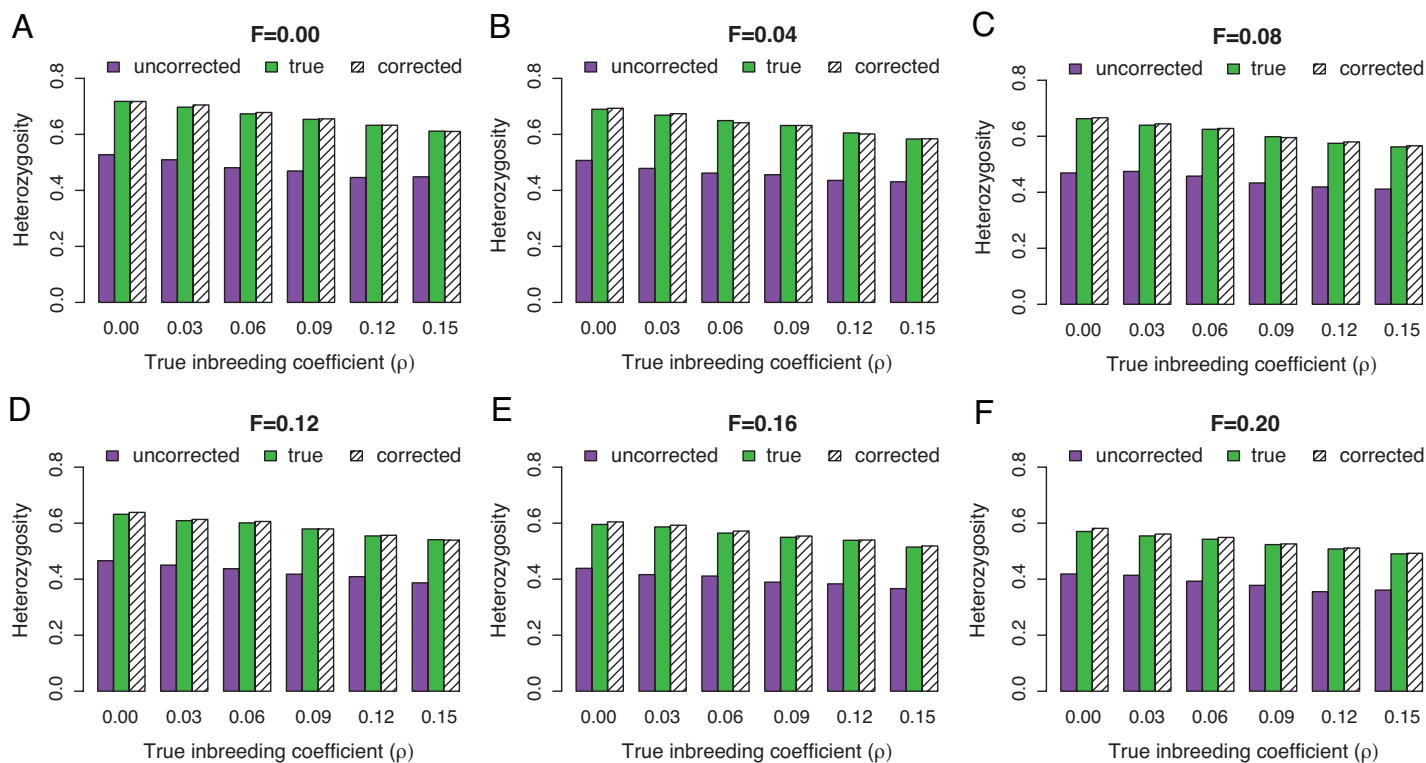

Figure S2: Correcting the underestimation of observed heterozygosity for simulated data with population structure. In each panel, a purple bar indicates the uncorrected observed heterozygosity averaged across all individuals in a simulated data set after applying allelic dropout; a green bar indicates the “true” observed heterozygosity averaged across all individuals in the same simulated data set before applying allelic dropout; and a striped black bar indicates the corrected observed heterozygosity averaged across all individuals and across 100 imputed data sets. The x-axis indicates values of the inbreeding coefficient that were set for different simulations. Different panels correspond to different values of the  $F$  parameter in the  $F$ -model for simulating structured populations. (A)  $F = 0$ ; (B)  $F = 0.04$ ; (C)  $F = 0.08$ ; (D)  $F = 0.12$ ; (E)  $F = 0.16$ ; (F)  $F = 0.20$ .
